# Supplementary material for: In situgeneration of a Ti3C2Tx(Tx= F, O and OH) MXene decorated CuO nanocomposite with extraordinary catalytic activity for TKX-50 thermal decomposition
Source: Royal Society of Chemistry journal article supplement (doi:10.1039/d2qm01244h), 2023-01-01
Supplement: d2qm01244h1.pdf [file d2qm01244h1.pdf]

# In-situ Generated of $Ti_3C_2T_x$ ( $T_x=F, O$ and $OH$ ) MXene Decorated CuO Nanocomposite with Extraordinary Catalytic Activity for TKX-50 Thermal Decomposition

Dongqi Liu<sup>a</sup>, Qiangqiang Lu<sup>a</sup>, Chunlei Xuan<sup>a</sup>, Lei Xiao<sup>a</sup>, Fengqi Zhao<sup>b</sup>, Xiaojun Feng<sup>b</sup>, Kun Zhang<sup>b</sup>, Jun Di<sup>\*a</sup>, Wei Jiang<sup>\*a</sup>, Gazi Hao<sup>\*a</sup>

(a: National Special Superfine Powder Engineering Research Center of China, School of Chemistry and Chemical Engineering, Nanjing University of Science and Technology, Nanjing 210094, China. )

(b: Xi' an Modern Chemistry Research Institute, Xi' an 710065, China.)

\*corresponding author.

Email: dijun@njjust.edu.cn (J. Di). superfine\_jw@126.com (W. Jiang). hgznjust1989@163.com (G. Hao).

## Supporting Information

### Measurement conditions

Powder X-ray diffraction (XRD) was performed using a Rigaku smartlab 9 with Rigaku's original cross beam optics system (rated voltage of 40 kV, rated current of 150 mA). Field emission scanning electron microscopy (FESEM) (ZEISS GeminiSEM 500, Germany) was used to observe GO,  $Ti_3AlC_2$ ,  $Ti_3C_2T_x$ , CuO etc.. X-ray photoelectron spectroscopy (XPS) measurements were carried out on an ESCALAB 250Xi spectrometer (Thermo Scientific, USA) equipped with a pass energy of 30 eV with a power of 100 W (10 kV and 10 mA) and a monochromatized Al  $K\alpha$  X-ray ( $h\nu = 1486.65$  eV) source. All samples were analyzed under a pressure of less than  $1.0 \times 10^{-9}$  Pa. Spectra were acquired using Avantage software (Version 5.979) with a step of 0.05 eV. Raman spectra were obtained using a Raman spectrometer (LabRAM HR Evolution, HORIBA JobinYvon, France) at room temperature using the 532 nm line as the excitation source. The thermal analysis experiment was conducted using METTLER TOLEDO TGA/DSC3<sup>+</sup>; the  $N_2$  flow rate was 50 ml/min; the selected heating rate were 5, 10, 15, and 20°C/min and the program heated from 50°C to 350°C.

### Experimental Section

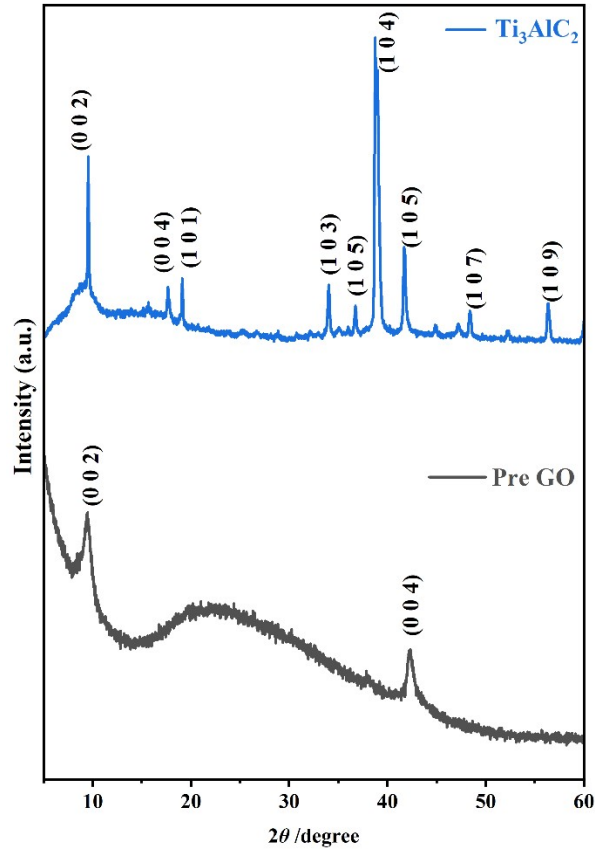

Fig. S1. XRD patterns of Pre GO (Graphite oxide) and  $\text{Ti}_3\text{AlC}_2$

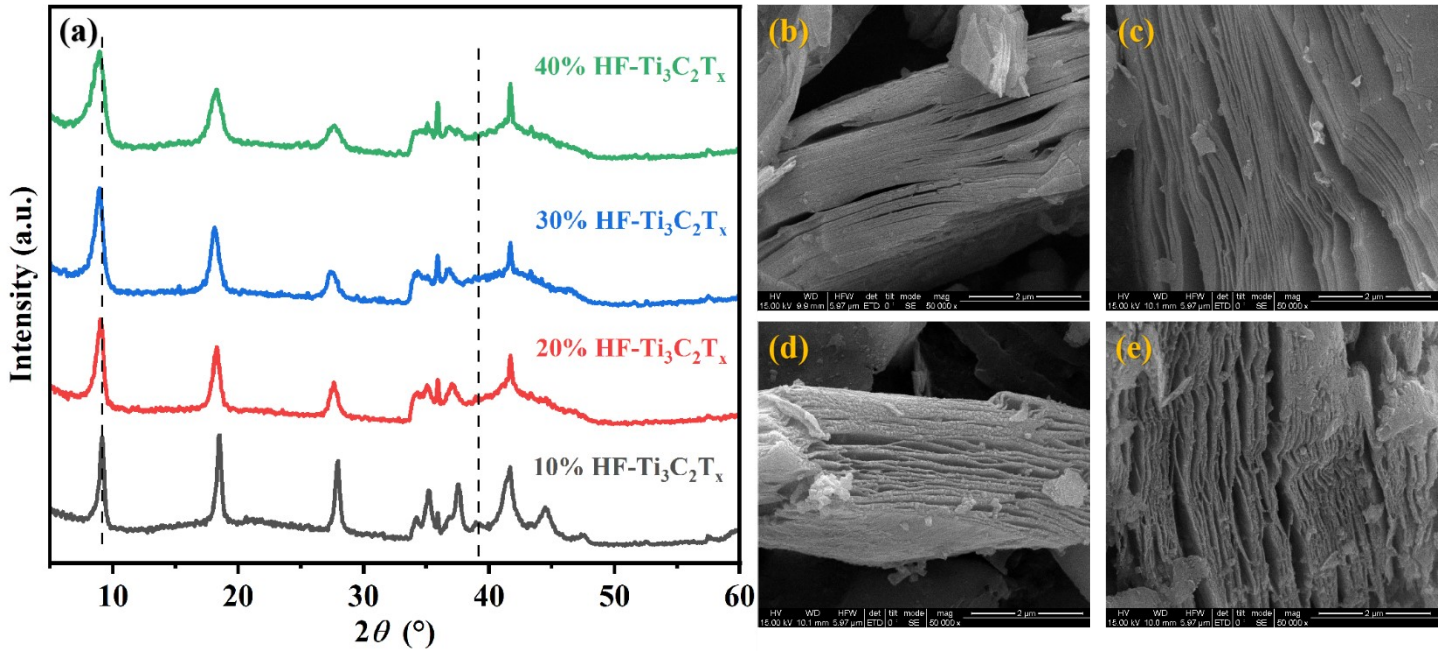

Fig. S2. (a) XRD patterns of 10%HF-Ti<sub>3</sub>C<sub>2</sub>T<sub>x</sub>, 20%HF-Ti<sub>3</sub>C<sub>2</sub>T<sub>x</sub>, 30%HF-Ti<sub>3</sub>C<sub>2</sub>T<sub>x</sub>, 40%HF-Ti<sub>3</sub>C<sub>2</sub>T<sub>x</sub>. SEM images of (b) 10%HF-Ti<sub>3</sub>C<sub>2</sub>T<sub>x</sub>, (c) 20%HF-Ti<sub>3</sub>C<sub>2</sub>T<sub>x</sub>, (d) 30%HF-Ti<sub>3</sub>C<sub>2</sub>T<sub>x</sub>, (e) 40%HF-Ti<sub>3</sub>C<sub>2</sub>T<sub>x</sub>.

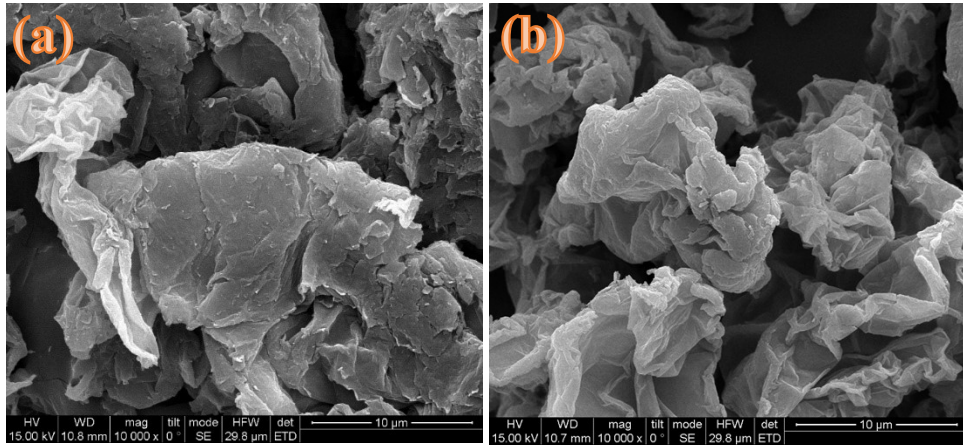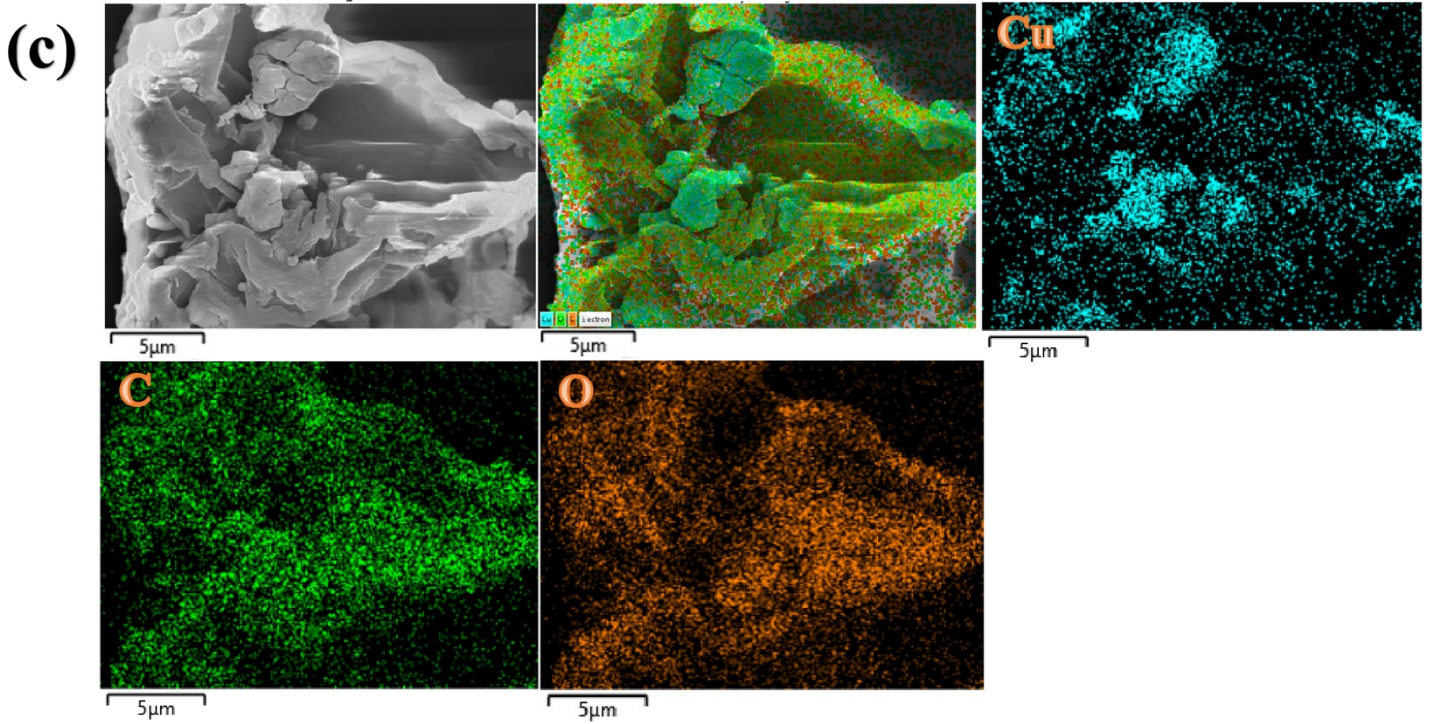



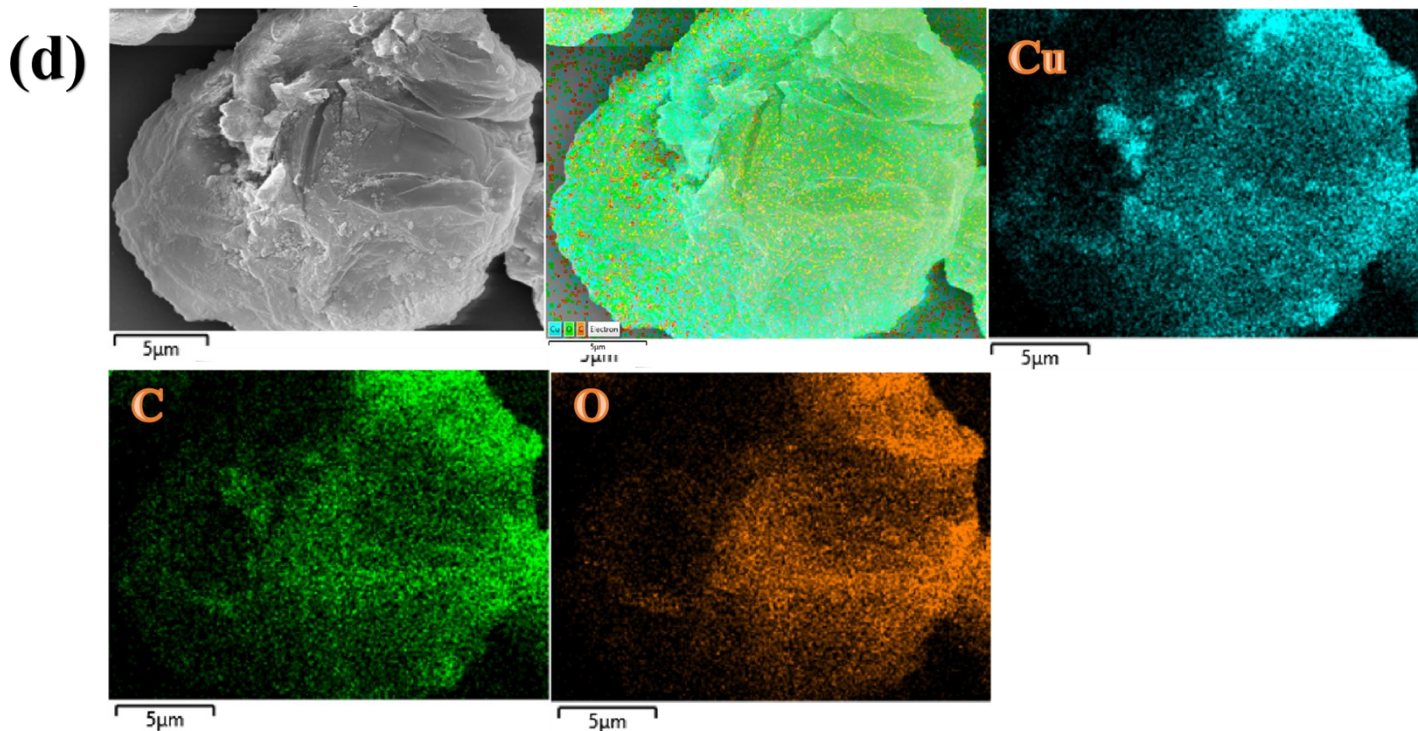

**Fig. S3.** SEM images of (a) Pre GO, (b) GO, (c) SEM images of GO/CuO composite and corresponding Cu, O, C elemental mapping. (d) SEM images of I-GO/CuO composite and corresponding Cu, O, C elemental mapping

As can be seen from **Fig. S4**, with the increase of HF etching concentration, the element distribution and valence states on the surface of  $\text{Ti}_3\text{C}_2\text{T}_x$  MXene change little, thus exerting a little influence on it<sup>1</sup>.

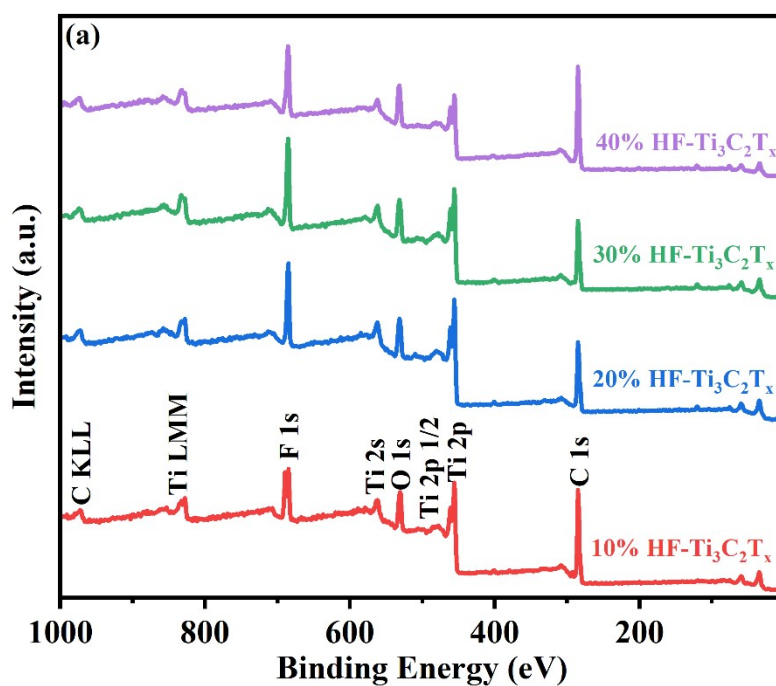

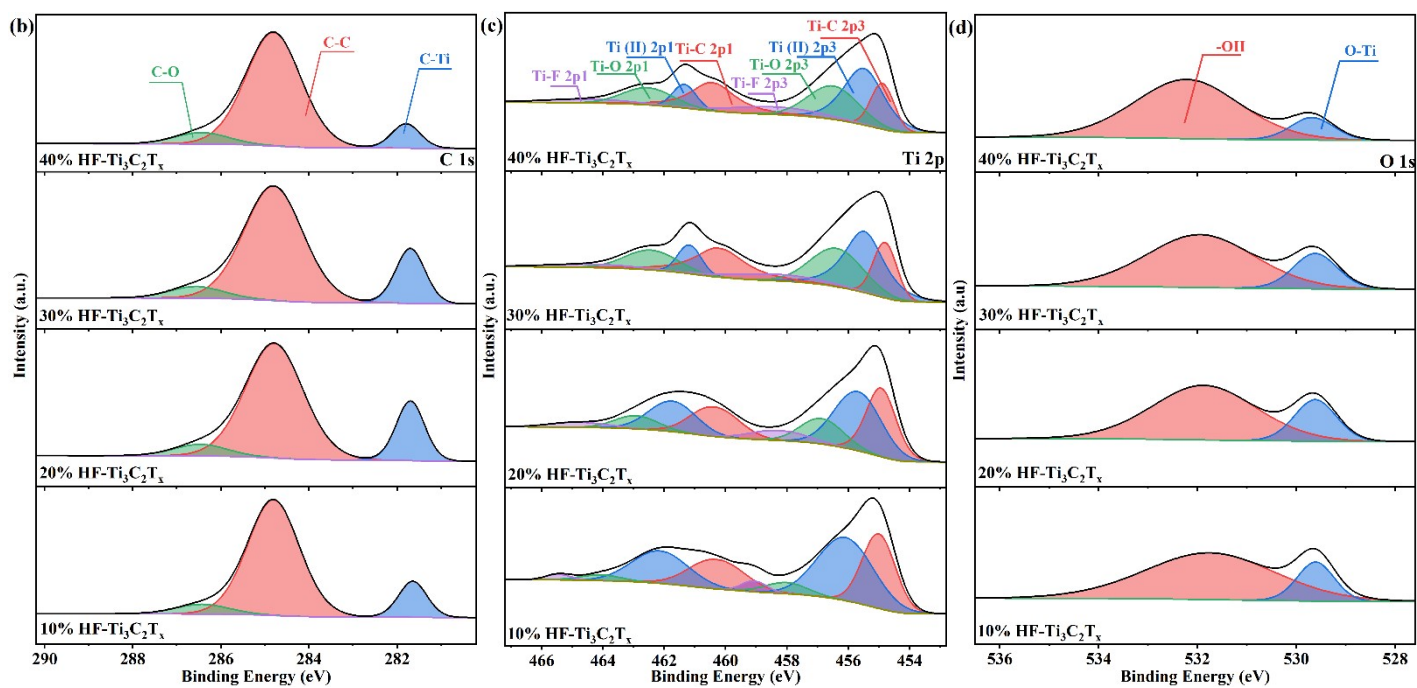

**Fig. S4.** XPS survey spectra of (a) 10%HF-Ti<sub>3</sub>C<sub>2</sub>T<sub>x</sub>, 20%HF-Ti<sub>3</sub>C<sub>2</sub>T<sub>x</sub>, 30%HF-Ti<sub>3</sub>C<sub>2</sub>T<sub>x</sub>, 40%HF-Ti<sub>3</sub>C<sub>2</sub>T<sub>x</sub>. High-resolution XPS spectra of (b) C 1s, (c) Ti 2p and (d) O 1s of 10%HF-Ti<sub>3</sub>C<sub>2</sub>T<sub>x</sub>, 20%HF-Ti<sub>3</sub>C<sub>2</sub>T<sub>x</sub>, 30%HF-Ti<sub>3</sub>C<sub>2</sub>T<sub>x</sub>, 40%HF-Ti<sub>3</sub>C<sub>2</sub>T<sub>x</sub>.

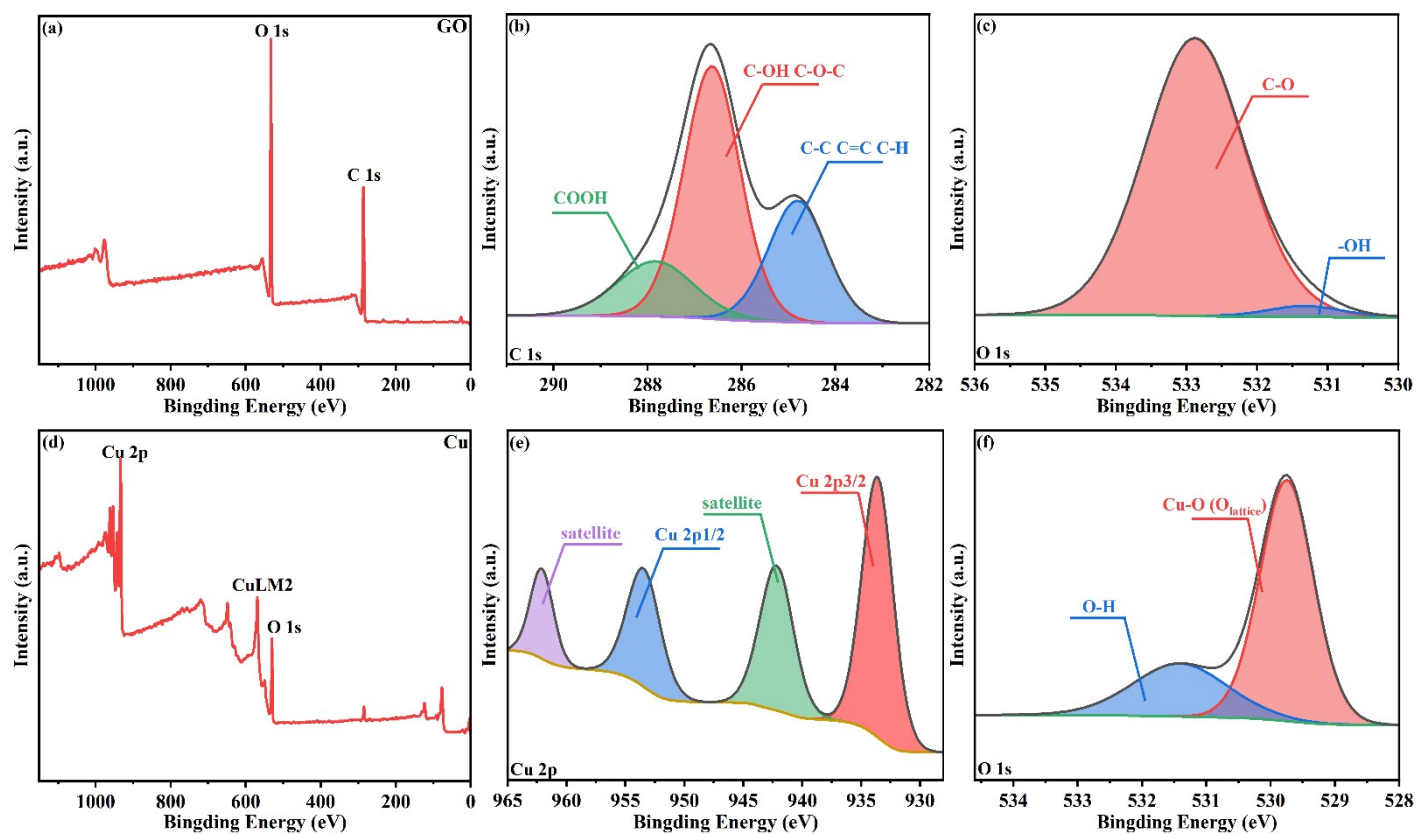

**Fig. S5.** XPS survey spectra of (a) GO. High-resolution XPS spectra of (b) C 1s, (c) O 1s of GO. XPS survey spectra of (d) CuO. High-resolution XPS spectra of (e) Cu 2p, (f) O 1s of CuO.

As shown in **Fig. S6a**, the characteristic peaks of D and G band near  $1360$  and  $1590\text{ cm}^{-1}$  are reflected in the GO and I-GO/CuO complex, while in **Fig. S6b**, each corresponding peak in  $\text{Ti}_3\text{C}_2\text{T}_x$  and I- $\text{Ti}_3\text{C}_2\text{T}_x/\text{CuO}$  is represented correspondingly, which indicates the generation of the complex. Meanwhile, the corresponding peak intensity of I-GO/CuO I- $\text{Ti}_3\text{C}_2\text{T}_x/\text{CuO}$  and spectrum are much weaker than that of GO and  $\text{Ti}_3\text{C}_2\text{T}_x$ . This may be related to the encapsulation structure of I-GO/CuO I- $\text{Ti}_3\text{C}_2\text{T}_x/\text{CuO}$ .

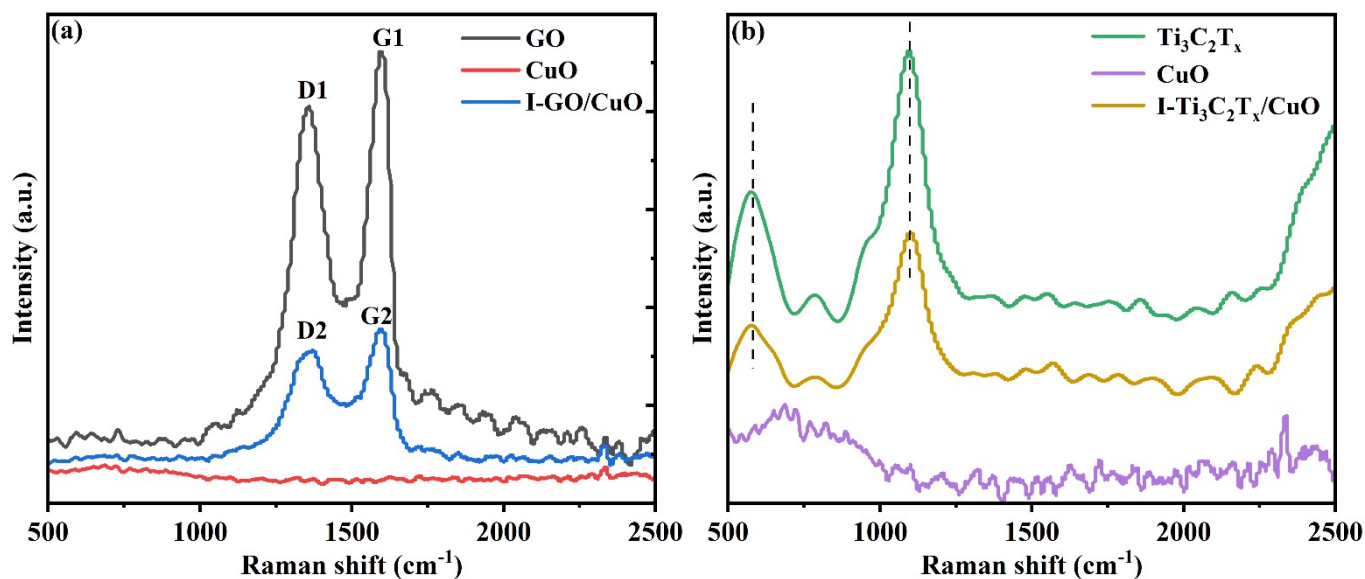

**Fig. S6.** Raman spectra of (a) GO, CuO, I-GO/CuO. (b)  $\text{Ti}_3\text{C}_2\text{T}_x$ , CuO, I-  $\text{Ti}_3\text{C}_2\text{T}_x/\text{CuO}$ .

### Catalysis performance

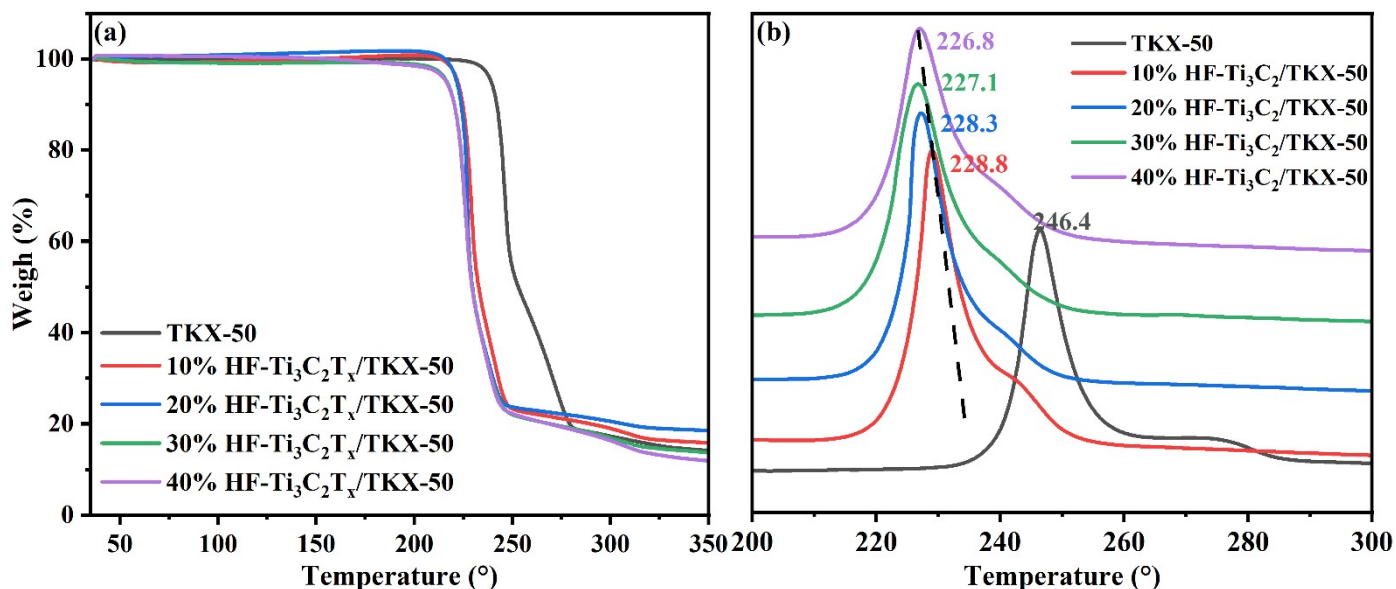

**Fig. S7.**  $10^{\circ}\text{C}/\text{min}$  heating rate (a) TG curves of 10%HF- $\text{Ti}_3\text{C}_2\text{T}_x$ , 20%HF- $\text{Ti}_3\text{C}_2\text{T}_x$ , 30%HF- $\text{Ti}_3\text{C}_2\text{T}_x$ , 40%HF- $\text{Ti}_3\text{C}_2\text{T}_x$ . (b) DSC curves of 10%HF- $\text{Ti}_3\text{C}_2\text{T}_x$ , 20%HF- $\text{Ti}_3\text{C}_2\text{T}_x$ , 30%HF- $\text{Ti}_3\text{C}_2\text{T}_x$ , 40%HF- $\text{Ti}_3\text{C}_2\text{T}_x$ .



## Catalysis mechanism

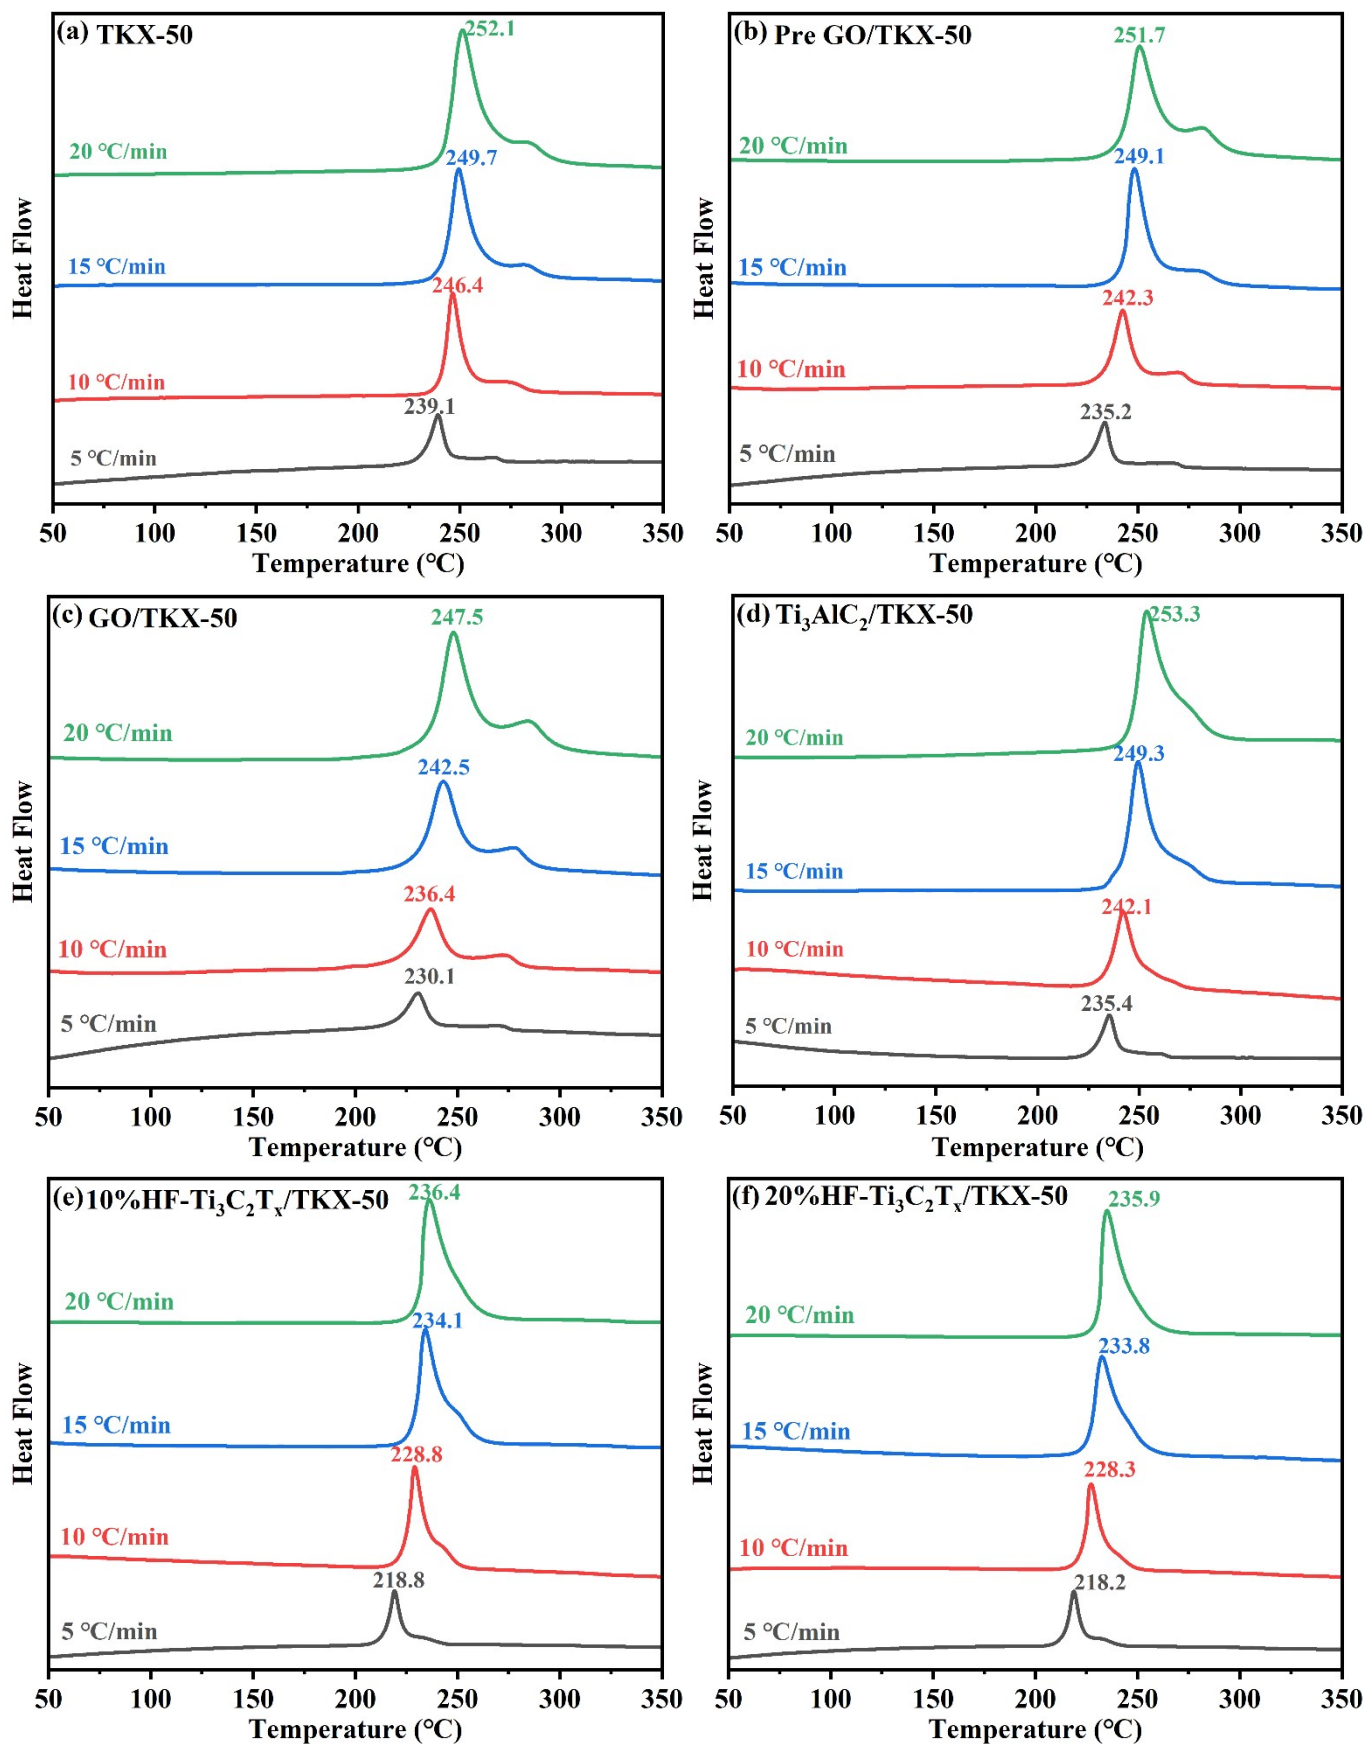

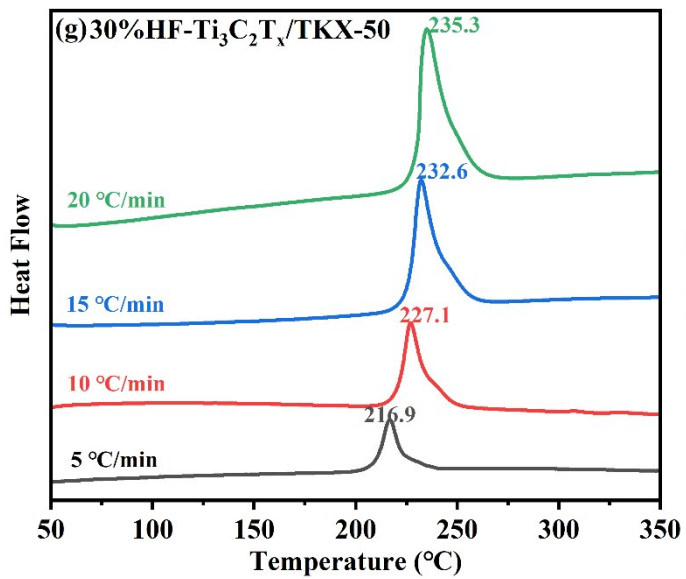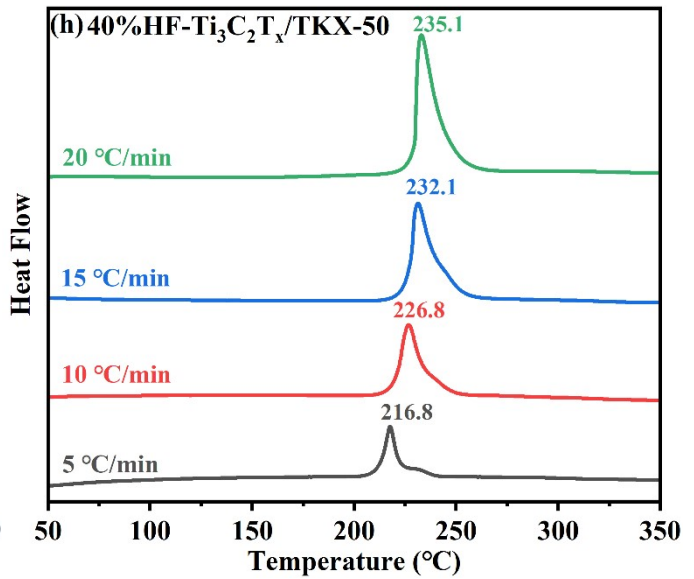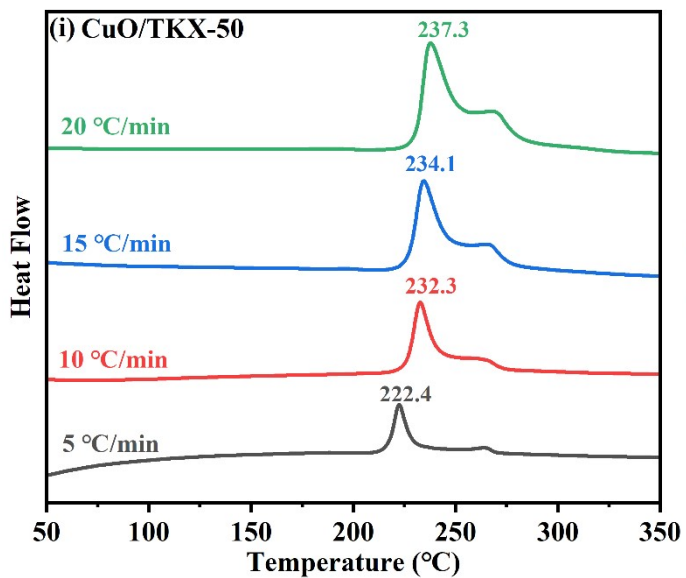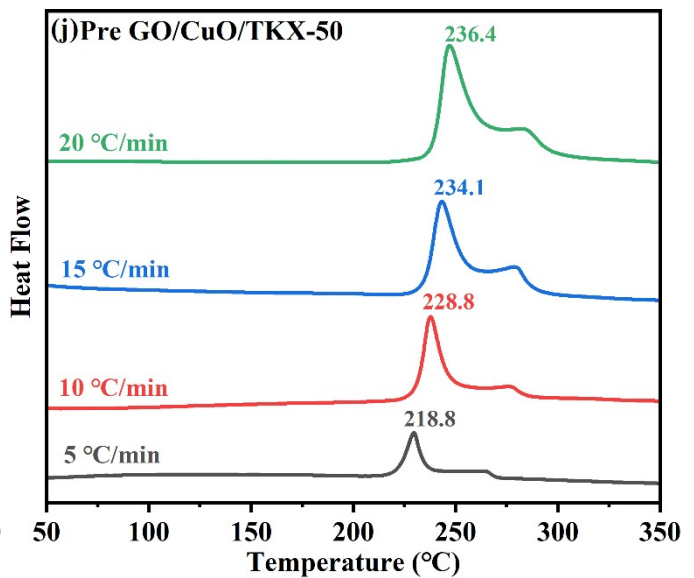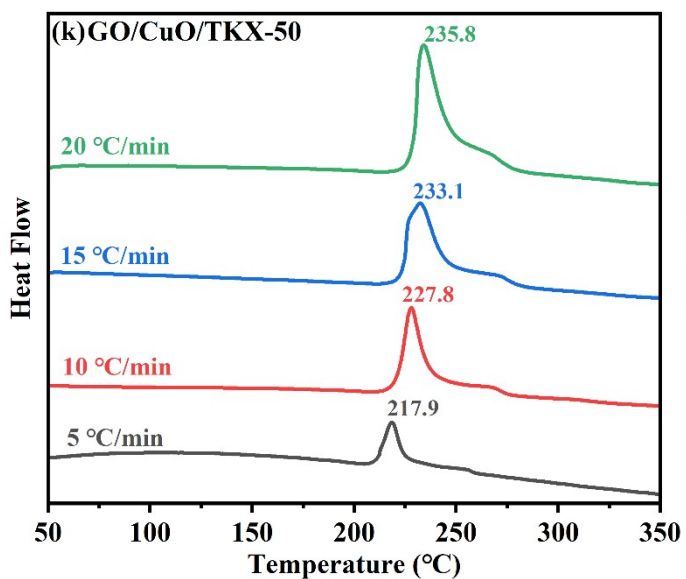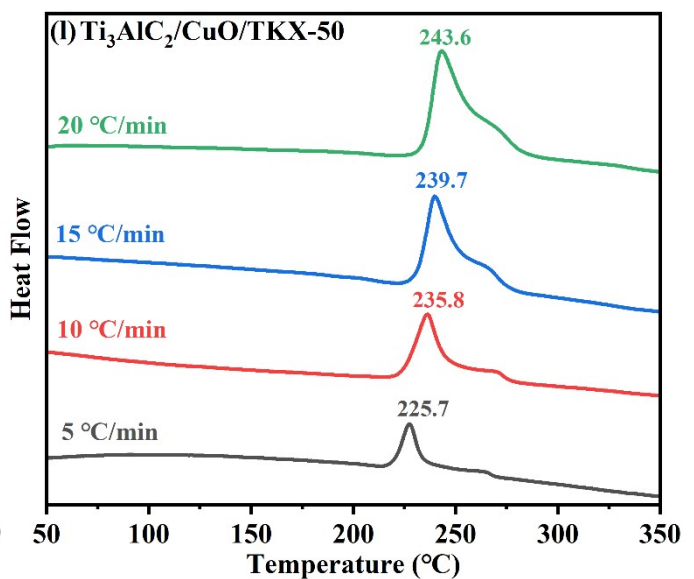



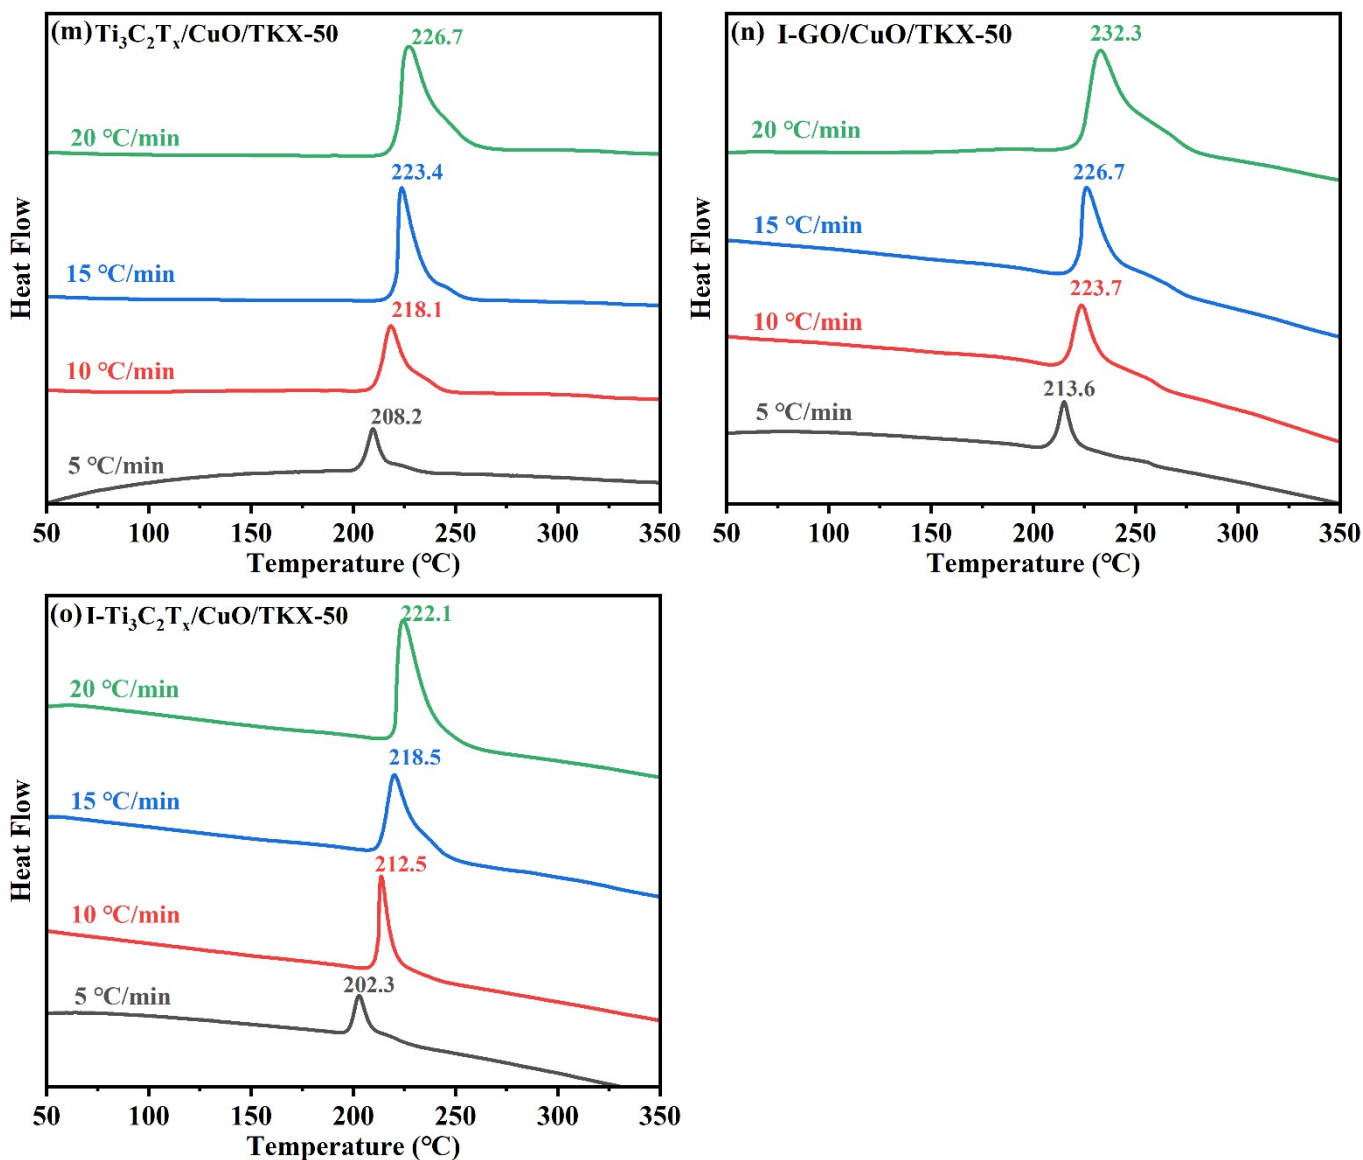

**Fig. S8** DSC curves of (a) TKX-50, (b) Pre GO/TKX-50, (c) GO/TKX-50, (d)  $\text{Ti}_3\text{AlC}_2/\text{TKX-50}$ , (e) 10%HF- $\text{Ti}_3\text{C}_2\text{T}_x/\text{TKX-50}$ , (f) 20%HF- $\text{Ti}_3\text{C}_2\text{T}_x/\text{TKX-50}$ , (g) 30%HF- $\text{Ti}_3\text{C}_2\text{T}_x/\text{TKX-50}$ , (h) 40%HF- $\text{Ti}_3\text{C}_2\text{T}_x/\text{TKX-50}$ . (i)  $\text{CuO}/\text{TKX-50}$  (j)Pre GO/ $\text{CuO}/\text{TKX-50}$  (k) GO/ $\text{CuO}/\text{TKX-50}$  (l)  $\text{Ti}_3\text{AlC}_2/\text{CuO}/\text{TKX-50}$  (m)  $\text{Ti}_3\text{C}_2\text{T}_x/\text{CuO}/\text{TKX-50}$  (n) I-GO/ $\text{CuO}/\text{TKX-50}$  (o) I- $\text{Ti}_3\text{C}_2\text{T}_x/\text{CuO}/\text{TKX-50}$

Heating rate  $\text{K}/\text{min} = ^\circ\text{C}/\text{min}$ ,  $T_p(\text{K}) = 273.15 + T_p(^{\circ}\text{C})$

**Table S1.** Thermal decomposition temperature established using DSC and Kissinger  $E_a$  calculations of energetic compounds with the MXene catalysts

| Sample        | $\beta$<br>(K/min) | $T_p$ (K) | $1000/T_p$ | $\ln(\beta/T_p^2)$ | $E_a$ (kJ/mol) | $R^2$  |
|---------------|--------------------|-----------|------------|--------------------|----------------|--------|
| TKX-50        | 5                  | 512.25    | 1.9521717  | -10.8681876        | 228.3          | 0.9913 |
|               | 10                 | 519.55    | 1.9247425  | -10.2033410        |                |        |
|               | 15                 | 522.85    | 1.9125944  | -9.81053903        |                |        |
|               | 20                 | 525.25    | 1.9038553  | -9.53201640        |                |        |
| Pre GO/TKX-50 | 5                  | 508.35    | 1.9671486  | -10.8529024        | 170.6          | 0.9828 |
|               | 10                 | 515.45    | 1.9400523  | -10.1874955        |                |        |
|               | 15                 | 522.25    | 1.9147917  | -9.8082426         |                |        |

|                                                             |    |        |           |              |       |        |
|-------------------------------------------------------------|----|--------|-----------|--------------|-------|--------|
|                                                             | 20 | 524.85 | 1.9053062 | -9.5304927   |       |        |
| GO/TKX-50                                                   | 5  | 503.25 | 1.9870839 | -10.8327362  | 163.4 | 0.9751 |
|                                                             | 10 | 509.55 | 1.9625159 | -10.1644708  |       |        |
|                                                             | 15 | 515.65 | 1.9392999 | -9.7828062   |       |        |
|                                                             | 20 | 520.65 | 1.9206760 | -9.5144237   |       |        |
| Ti <sub>3</sub> AlC <sub>2</sub> /TKX-50                    | 5  | 508.55 | 1.9663749 | -10.8536891  | 160.1 | 0.9722 |
|                                                             | 10 | 515.25 | 1.9408054 | -10.1867193  |       |        |
|                                                             | 15 | 522.45 | 1.9140587 | -9.8090083   |       |        |
|                                                             | 20 | 526.45 | 1.8995156 | -9.53658044  |       |        |
| 10%HF-Ti <sub>3</sub> C <sub>2</sub> T <sub>x</sub> /TKX-50 | 5  | 491.95 | 2.0327269 | -10.78731626 | 150.8 | 0.9833 |
|                                                             | 10 | 501.95 | 1.9922303 | -10.13441593 |       |        |
|                                                             | 15 | 507.25 | 1.9714144 | -9.749957756 |       |        |
|                                                             | 20 | 509.55 | 1.9625159 | -9.471323693 |       |        |
| 20%HF-Ti <sub>3</sub> C <sub>2</sub> T <sub>x</sub> /TKX-50 | 5  | 491.35 | 2.0352091 | -10.7848755  | 148.6 | 0.9803 |
|                                                             | 10 | 501.45 | 1.9942167 | -10.13242271 |       |        |
|                                                             | 15 | 506.95 | 1.9725811 | -9.7487745   |       |        |
|                                                             | 20 | 509.05 | 1.9644435 | -9.4693602   |       |        |
| 30%HF-Ti <sub>3</sub> C <sub>2</sub> T <sub>x</sub> /TKX-50 | 5  | 490.05 | 2.0406081 | -10.7795769  | 141.1 | 0.9887 |
|                                                             | 10 | 500.25 | 1.9990005 | -10.1276308  |       |        |
|                                                             | 15 | 505.75 | 1.9772614 | -9.7440347   |       |        |
|                                                             | 20 | 508.45 | 1.9667617 | -9.4670014   |       |        |
| 40%HF-Ti <sub>3</sub> C <sub>2</sub> T <sub>x</sub> /TKX-50 | 5  | 489.95 | 2.0410245 | -10.7791687  | 146.1 | 0.9924 |
|                                                             | 10 | 499.95 | 2.0002000 | -10.1264310  |       |        |
|                                                             | 15 | 505.25 | 1.9792182 | -9.7420565   |       |        |
|                                                             | 20 | 508.25 | 1.9675356 | -9.4662146   |       |        |
| CuO/TKX-50                                                  | 5  | 495.55 | 2.0179598 | -10.8018986  | 169.6 | 0.9913 |
|                                                             | 10 | 505.45 | 1.9784350 | -10.1483131  |       |        |
|                                                             | 15 | 508.45 | 1.9667617 | -9.7546835   |       |        |
|                                                             | 20 | 511.85 | 1.9536973 | -9.4803309   |       |        |
| Pre GO/CuO/TKX-50                                           | 5  | 491.95 | 2.0327269 | -10.7873162  | 150.7 | 0.9833 |
|                                                             | 10 | 501.95 | 1.9922303 | -10.1344159  |       |        |
|                                                             | 15 | 507.25 | 1.9714144 | -9.7499577   |       |        |
|                                                             | 20 | 509.55 | 1.9625159 | -9.4713236   |       |        |
| GO/CuO/TKX-50                                               | 5  | 491.05 | 2.0364525 | -10.7836544  | 149.8 | 0.9896 |
|                                                             | 10 | 500.95 | 1.9962072 | -10.1304275  |       |        |
|                                                             | 15 | 505.25 | 1.9753086 | -9.7460110   |       |        |
|                                                             | 20 | 507.95 | 1.9648295 | -9.4689672   |       |        |
| Ti <sub>3</sub> AlC <sub>2</sub> /CuO/TKX-50                | 5  | 498.85 | 2.0046106 | -10.8151729  | 158.1 | 0.9878 |
|                                                             | 10 | 508.95 | 1.9648295 | -10.1621144  |       |        |
|                                                             | 15 | 512.85 | 1.9498878 | -9.7719166   |       |        |
|                                                             | 20 | 516.75 | 1.9351717 | -9.4993861   |       |        |
| Ti <sub>3</sub> C <sub>2</sub> T <sub>x</sub> /CuO/TKX-50   | 5  | 481.35 | 2.0774903 | -10.7437514  | 141.7 | 0.9929 |
|                                                             | 10 | 491.25 | 2.0356234 | -10.0913212  |       |        |
|                                                             | 15 | 496.55 | 2.0138958 | -9.7073181   |       |        |
|                                                             | 20 | 499.55 | 2.0018016 | -9.4316831   |       |        |
| I-GO/CuO/TKX-50                                             | 5  | 486.75 | 2.0544427 | -10.7660633  | 146.9 | 0.9736 |
|                                                             | 10 | 496.85 | 2.0126798 | -10.1139912  |       |        |
|                                                             | 15 | 499.85 | 2.0006001 | -9.7205659   |       |        |

|                                                             |    |        |             |              |       |        |
|-------------------------------------------------------------|----|--------|-------------|--------------|-------|--------|
|                                                             | 20 | 505.45 | 1.9784350   | -9.4551659   |       |        |
| I-Ti <sub>3</sub> C <sub>2</sub> T <sub>x</sub> /CuO/TKX-50 | 5  | 475.45 | 2.103270586 | -10.71908554 | 127.6 | 0.9978 |
|                                                             | 10 | 485.65 | 2.059096057 | -10.06839131 |       |        |
|                                                             | 15 | 491.65 | 2.033967253 | -9.687483961 |       |        |
|                                                             | 20 | 495.25 | 2.019182231 | -9.414393098 |       |        |

1. Cao, Y.; Deng, Q.; Liu, Z.; Shen, D.; Wang, T.; Huang, Q.; Du, S.; Jiang, N.; Lin, C.-T.; Yu, J., Enhanced thermal properties of poly(vinylidene fluoride) composites with ultrathin nanosheets of MXene. *RSC Advances* **2017**, 7 (33), 20494-20501.
